# Supplementary material for: Up-conversion monodispersed spheres of NaYF4:Yb3+/Er3+: green and red emission tailoring mediated by heating temperature, and greatly enhanced luminescence by Mn2+ doping
Source: Royal Society of Chemistry journal article supplement (doi:10.1039/c8dt00792f), 2018-01-01
Supplement: c8dt00792f1.pdf [file c8dt00792f1.pdf]

## Electronic supplementary information (ESI)

Up-conversion monodispersed spheres of  $\text{NaYF}_4:\text{Yb}^{3+}/\text{Er}^{3+}$ : green and red emission tailoring mediated by heating temperature, and greatly enhanced luminescence by  $\text{Mn}^{2+}$  doping

Qi Zhu<sup>1,2\*</sup>, Caiyun Song<sup>1,2</sup>, Xiaodong Li<sup>1,2</sup>, Xudong Sun<sup>1,2,3</sup> and Ji-Guang Li<sup>4\*</sup>

<sup>1</sup>*Key Laboratory for Anisotropy and Texture of Materials (Ministry of Education), Northeastern University, Shenyang, Liaoning 110819, China*

<sup>2</sup>*Institute of Ceramics and Powder Metallurgy, School of Materials Science and Engineering, Northeastern University, Shenyang, Liaoning 110819, China*

<sup>3</sup>*School of Environmental and Chemical Engineering, Dalian University, Dalian, Liaoning 116622, China*

<sup>4</sup>*Research Center for Functional Materials, National Institute for Materials Science, Namiki 1-1, Tsukuba, Ibaraki 305-0044, Japan*

\*E-mail: [zhuq@smm.neu.edu.cn](mailto:zhuq@smm.neu.edu.cn) and [LI.Jiguang@nims.go.jp](mailto:LI.Jiguang@nims.go.jp)

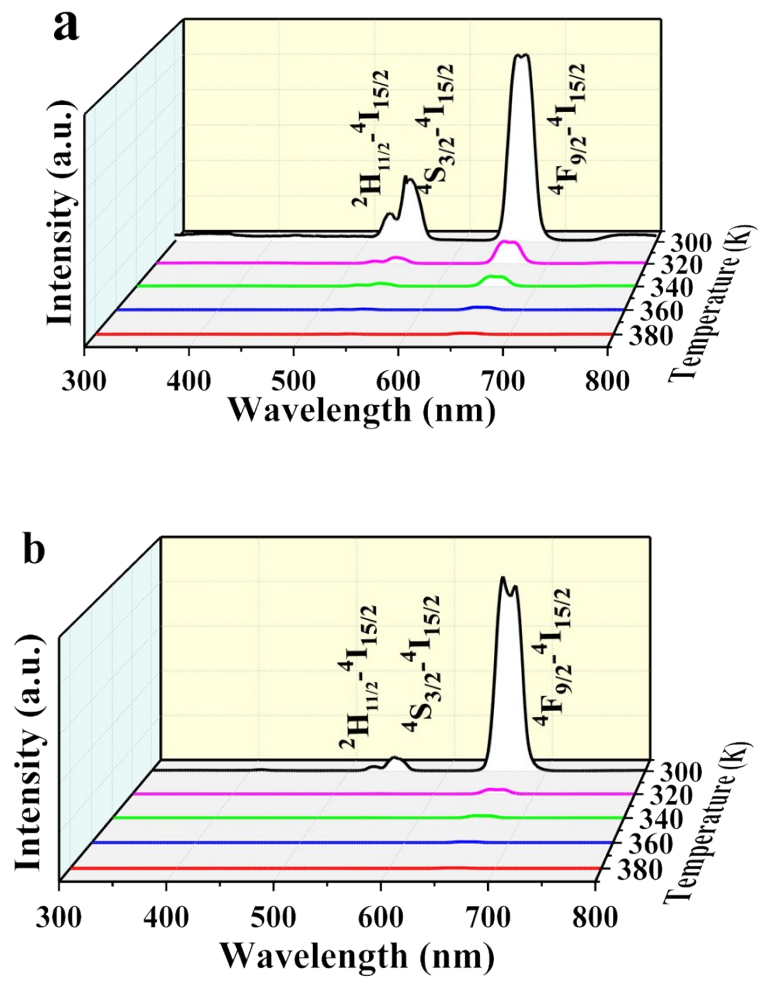

Figure S1. Temperature-dependence of PL spectra from 300 to 380 K for (a)  $Yb^{3+}/Er^{3+}$ - and (b)  $Mn^{2+}/Yb^{3+}/Er^{3+}$ -samples.
